# Supplementary material
Source: ML conference proceedings conference paper supplement (https://openreview.net/forum?id=liVX9If9k2)

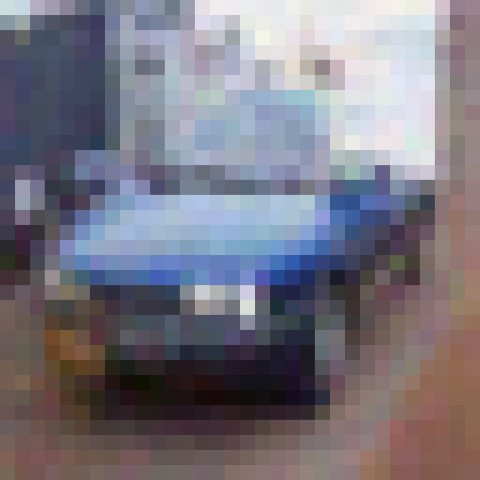

Supplement: supplementary_material [file Fig_1_Mod_1.pdf › mutual_info_flow_matching-main/dataset_generation/figs/Fig_1_Mod_1.pdf]

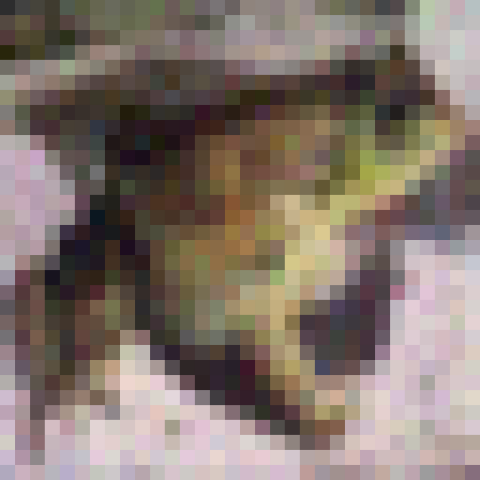

Supplement: supplementary_material [file Fig_1_Mod_2.pdf › mutual_info_flow_matching-main/dataset_generation/figs/Fig_1_Mod_2.pdf]
